# Supplementary material
Source: PubMed Central journal article supplement (PMC6904748)

**YMTHE, Volume 27**

**Supplemental Information**

**Systemic Delivery of CRISPR/Cas9 Targeting  
HPV Oncogenes Is Effective at Eliminating  
Established Tumors**

**Luqman Jubair, Sora Fallaha, and Nigel A.J. McMillan**

## Supplementary Data

**Table 1** shows the sequences of the target sites within each gene, and the repair template sequences used for HDR repair

| Name                      | Target sequence 5'>3'                                                                                                                                 | Binding site | Expected cut site within the target gene |
|---------------------------|-------------------------------------------------------------------------------------------------------------------------------------------------------|--------------|------------------------------------------|
| HPV-16 E6 T1              | <u>Ccactgtgtcctgaagaaaagca</u>                                                                                                                        | 349-369      | 382                                      |
| HPV-16 E6 T2              | Tccataatataaggggt <u>cgg</u>                                                                                                                          | 394-411      |                                          |
| HPV-16 E7 T1              | <u>Ccggacagagcccattacaatat</u>                                                                                                                        | 141-162      | 169                                      |
| HPV-16 E7 T2              | Gcaagtgtgactctacgctt <u>cgg</u>                                                                                                                       | 176-195      |                                          |
| HPV-18 E6 T1              | <u>Ccataaatgtatagattttta</u>                                                                                                                          | 197-215      | 228                                      |
| HPV-18 E6 T2              | Ttattcagactctgtgtat <u>gg</u>                                                                                                                         | 240-258      |                                          |
| HPV-18 E7 T1              | <u>Ccggttgaccttctatgtca</u>                                                                                                                           | 66-83        | 96                                       |
| HPV-18 E7 T2              | Gaaaacgatgaaatagat <u>gg</u>                                                                                                                          | 108-125      |                                          |
| Control gRNA              | tcgtactctacagcagatgc                                                                                                                                  |              |                                          |
|                           |                                                                                                                                                       |              |                                          |
| Name                      | Template sequence                                                                                                                                     |              |                                          |
| HPV-16 E6 repair template | attaactgtc aaaagccact gtgtcctgaa gaaaagcaaa gacatctgga <b>caattaataagtaagcaa</b><br>agattccata atataagggg tcggtggacc ggtc gatgta tgtctgttg            |              |                                          |
| HPV-16 E7 repair template | aatagatggt ccagctggac aagcagaacc ggacagagcc cattacaata ttgtaacct <b>aattaatt</b><br>ttgttgcaag tgtgactcta cgcttcggtt gtgcgtacaa agcacacacg tagacattcg |              |                                          |

Underlined nucleic acids are the protospacer-adjacent motif, nucleic acids highlighted in bold represent the inserted modification (stop codon and *AseI* restriction site), T1: target 1, T2: target two.

**Supplementary figure 1: PEGylated liposomes effectively protected plasmid DNA against serum-mediated degradation and delivered payloads out of bloodstream (I) The integrity of plasmid DNA packaged in PEGylated liposomes after incubation in serum (in hours). (II) The time from the injection of plasmid DNA packaged in liposomes to its systemic uptake in tissues and organs (in hours).**

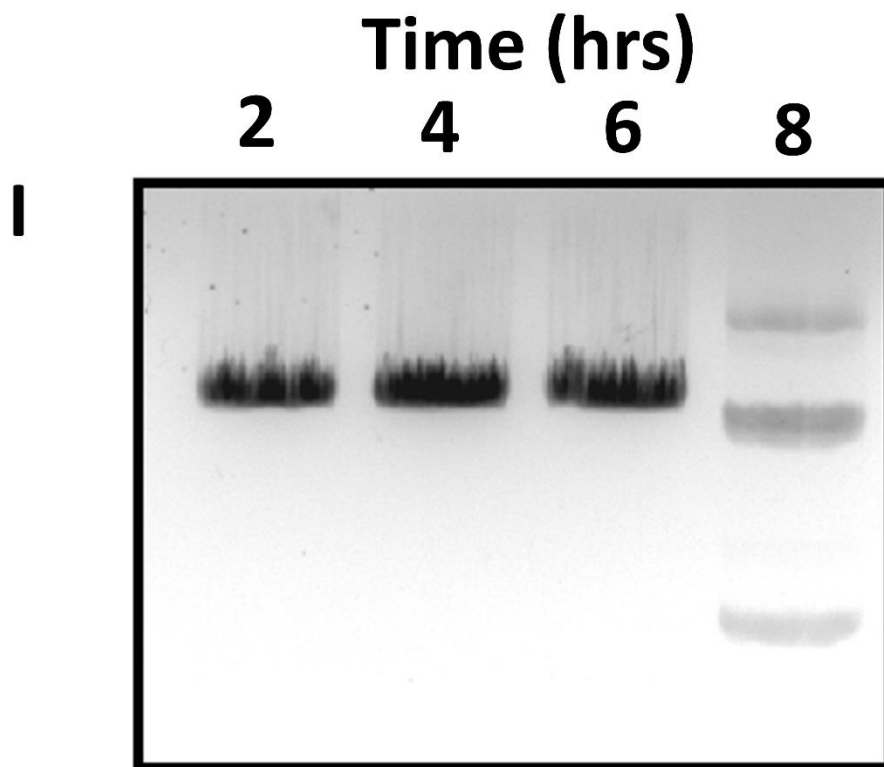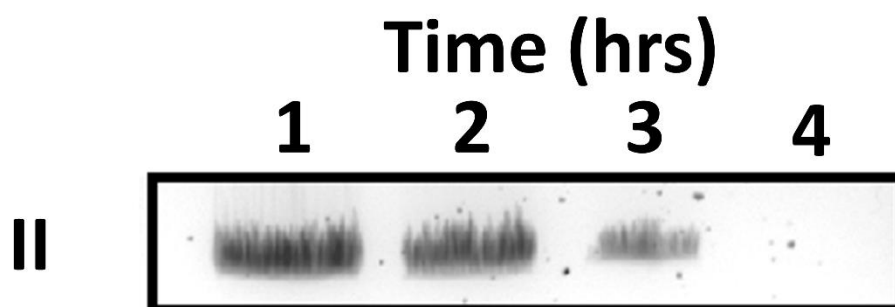

Supplement: mmc1.pdf [file mmc1.pdf]
